# Supplementary material
Source: Springer Nature journal article supplement (https://www.springermedizin.de/resource/supplementary/12943_2013_1242_MOESM3_ESM.pdf/9553078)

**A)**

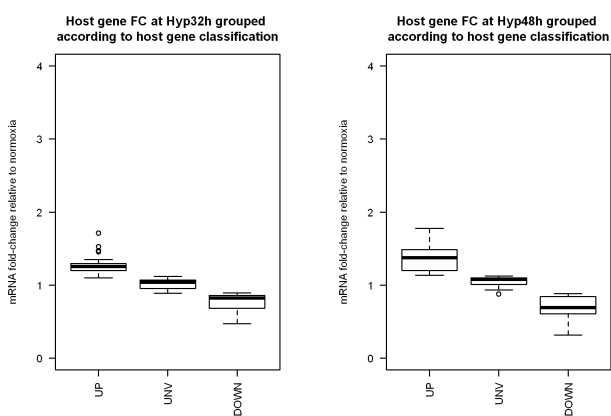

**B)**

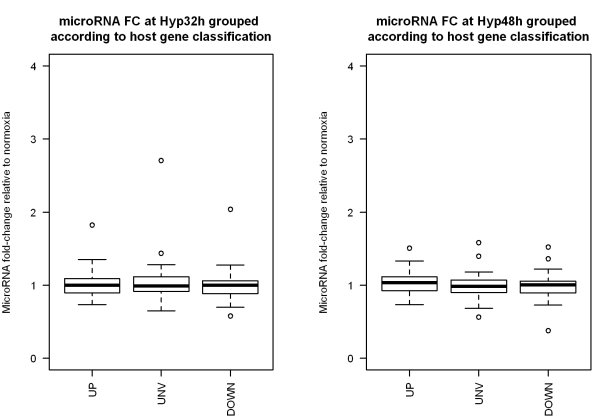

**C)**

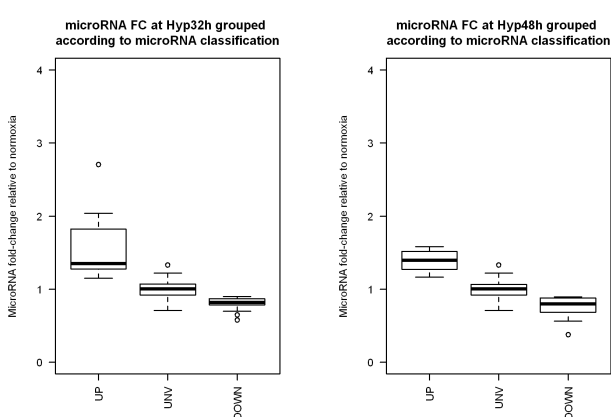

**D)**

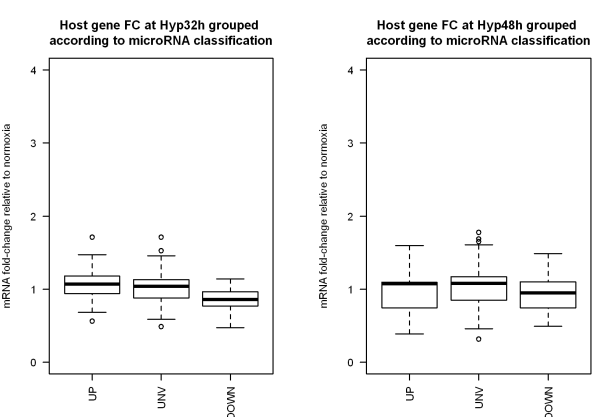

Supplement: MOESM3 [file 9553078]
